# Supplementary material
Source: publisher figshare collection journal article supplement (https://acs.figshare.com/ndownloader/files/4082965)
Supplement: Supplementary file 1 [file 4082965]

**Supporting Online Material for**  
**Facile Syntheses of Cucurbit[6]uril Anchored Polymers and Their**  
**Non-covalent Modification**

Xiaoling Huang, Fanglin Hu, Haiquan Su\*

School of Chemistry and Chemical Engineering, Inner Mongolia University, Hohhot,  
010021, China.

Corresponding author: Haiquan Su, [haiquansu@yahoo.com](mailto:haiquansu@yahoo.com)

\*To whom correspondence should be addressed. Tel.: +86 471 4992979. Fax: +86  
471 4992979. Eail: [haiquansu@yahoo.com](mailto:haiquansu@yahoo.com)

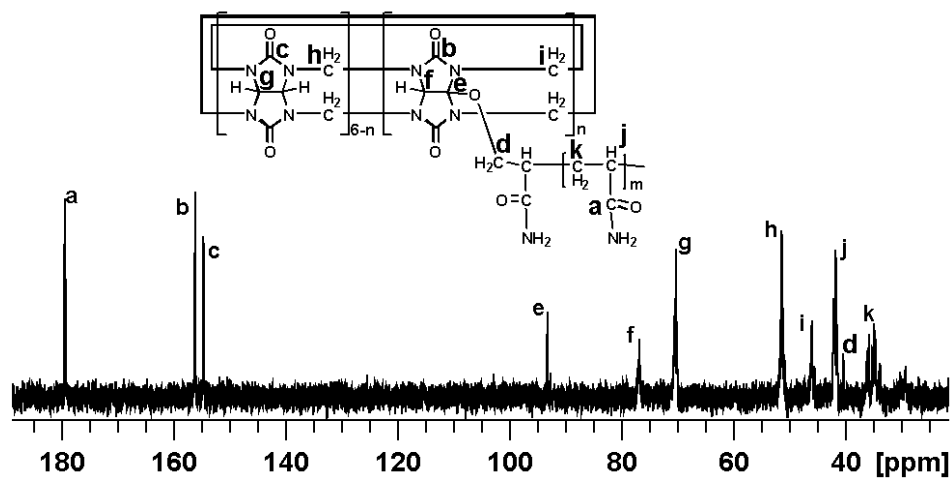

**Figure S1.** The  $^{13}\text{C}$ -NMR spectrum of the CB[6]-PAM-3 polymer.

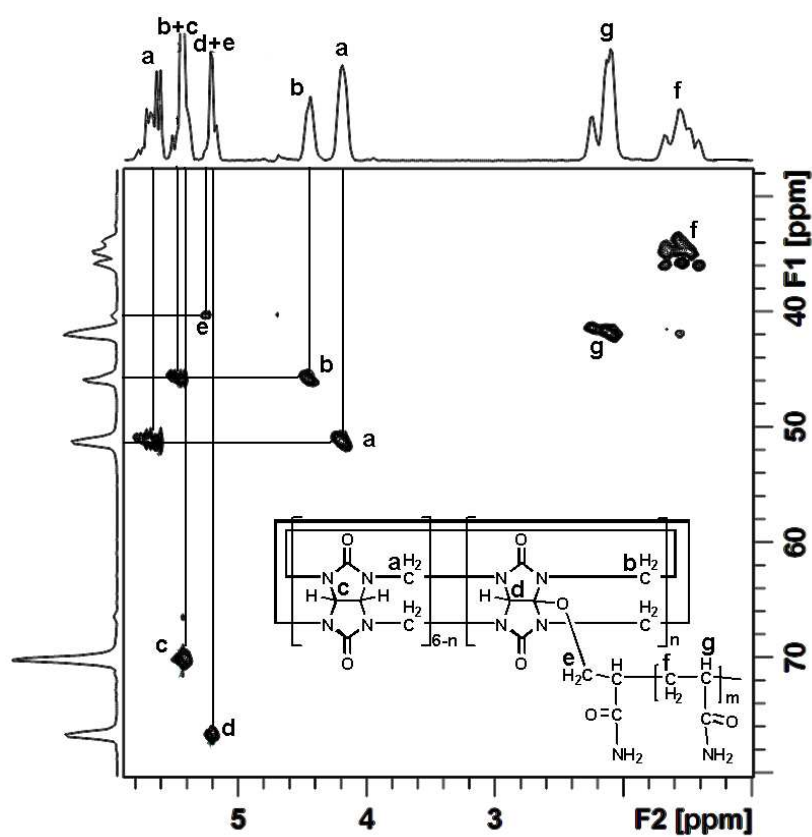

**Figure S2.** C, H-COSY NMR spectra of CB[6]-PAM-3 polymer.

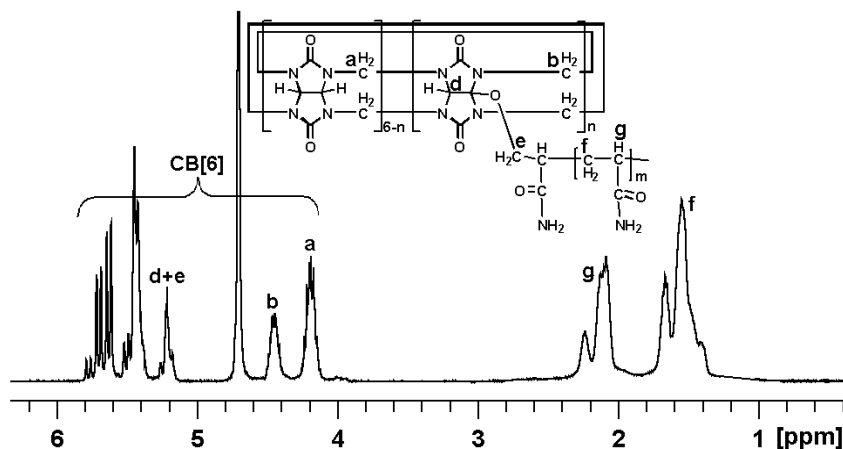

**Figure S3.**  $^1\text{H}$ -NMR spectrum of CB[6]-PAM-3. The PAM/CB[6] and the average grafting degree of CB[6] were obtained from  $^1\text{H}$ -NMR. The PAM/CB[6] was confirmed by comparing the integral intensity of the peaks from the CB[6] segments (the sum of a and b signals in figure S3) with that the peaks of polyacrylamide segment (signal g in figure S3). The average grafting degree of CB[6] was obtained by comparing the signal intensity of the methylene protons of grafting units (signal b in figure S3) with that of all the methylene protons of CB[6] (the sum of a and b signals in figure S3).

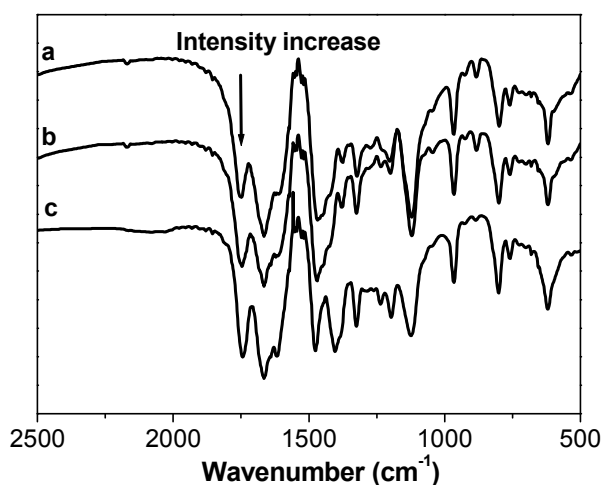

**Figure S4.** FTIR spectra of (a) CB[6]-PAM-1, (b) CB[6]-PAM-2 and (c) CB[6]-PAM-3

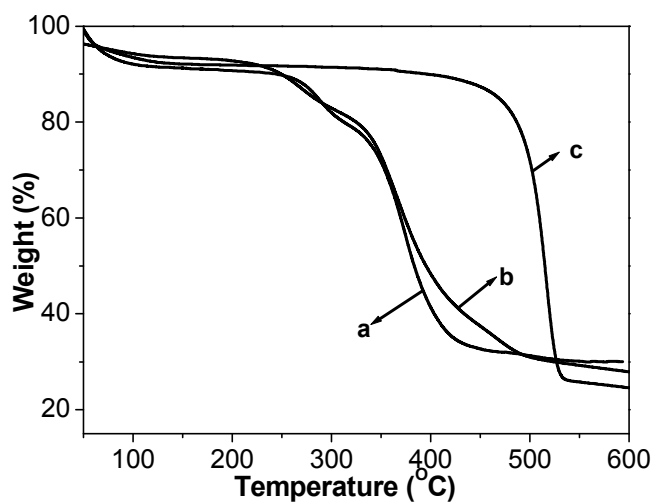

Figure S5. TGA curves of (a) PAM, (b) CB[6]-PAM-3 and (c) CB[6]

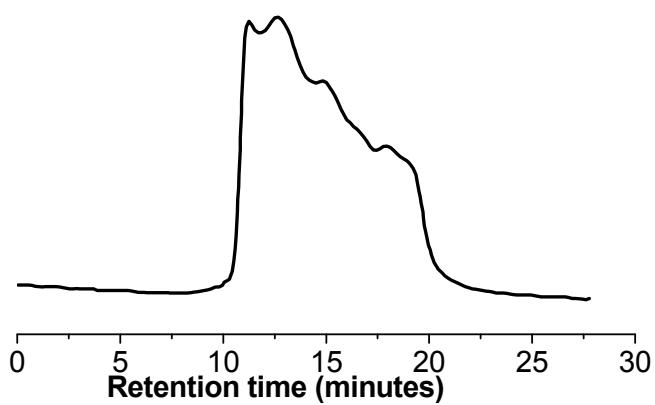

Figure S6. GPC trace of CB[6]-PAM-1 in phosphate buffer solution eluent

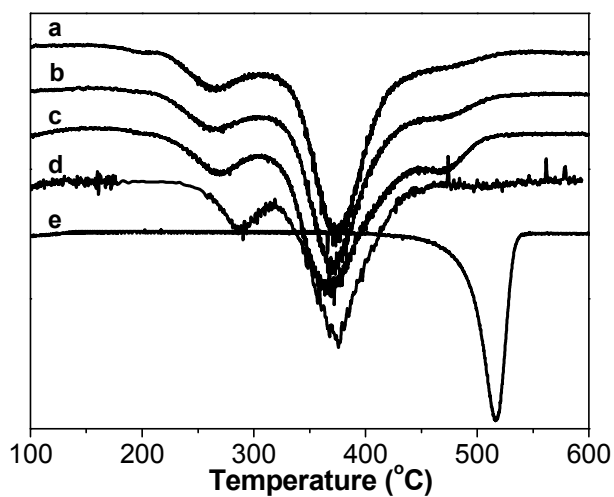

Figure S7. DTGA curves of (a) CB[6]-PAM-1, (b) CB[6]-PAM-2, (c) CB[6]-PAM-3, (d) PAM and (e) CB[6]
